# Supplementary figures and images for: An automatic contrail tracking algorithm
Source: Copernicus journal article supplement (doi:10.5194/amt-3-1089-2010), 2010-08-19

200904051600

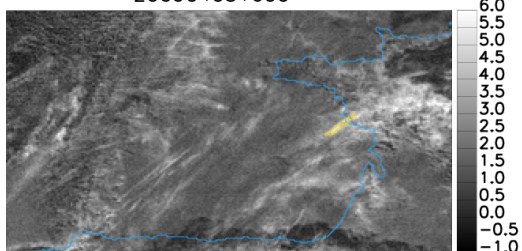

200904051605

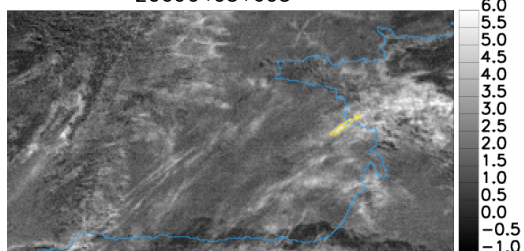

200904051610

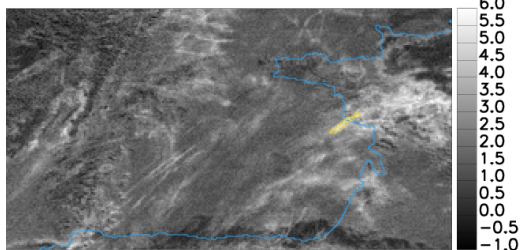

200904051615

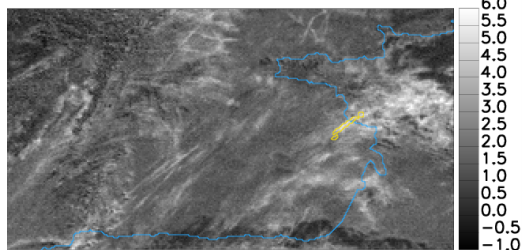

200904051620

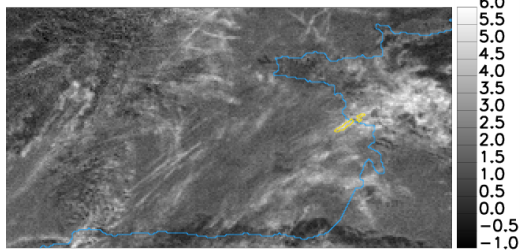

200904051625

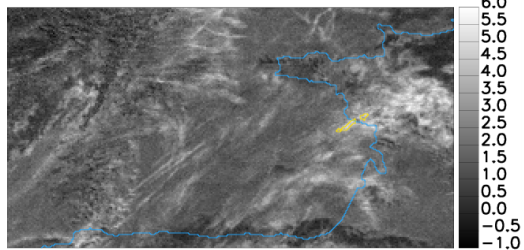

200904051630

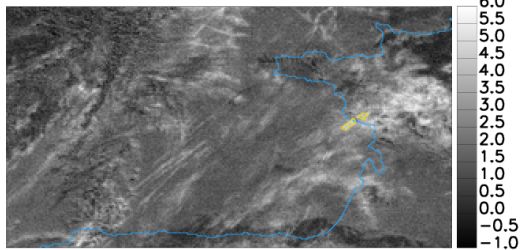

200904051635

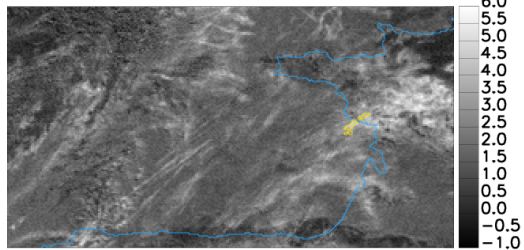

200904051640

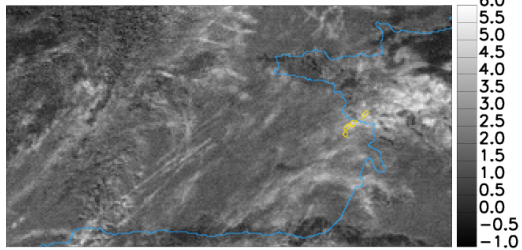

200904051645

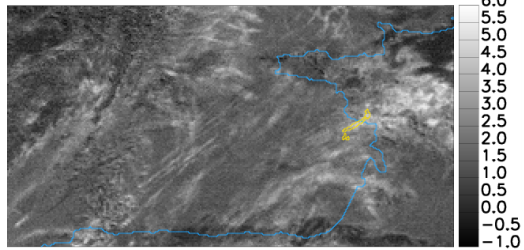

200904051650

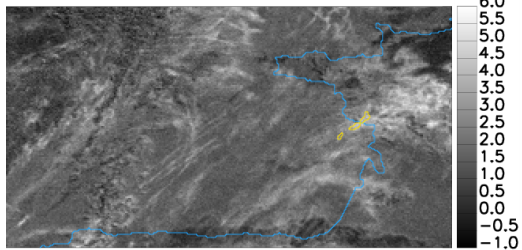

200904051655

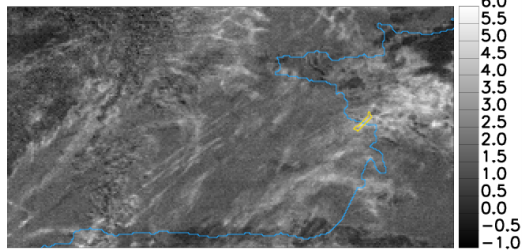

Supplement: Supplementary file 1 [file amt-3-1089-2010-supplement.zip]

200904051500

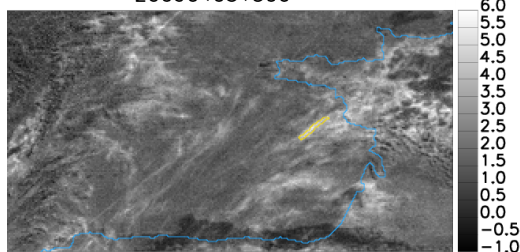

200904051505

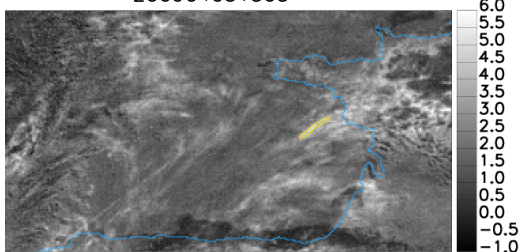

200904051510

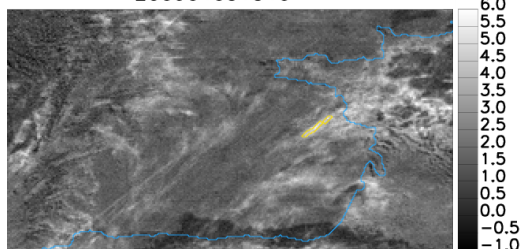

200904051515

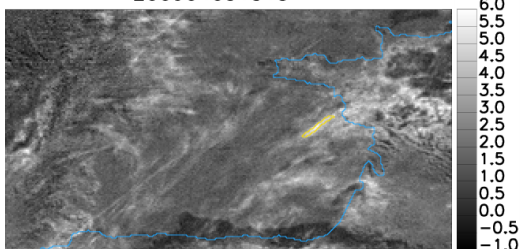

200904051520

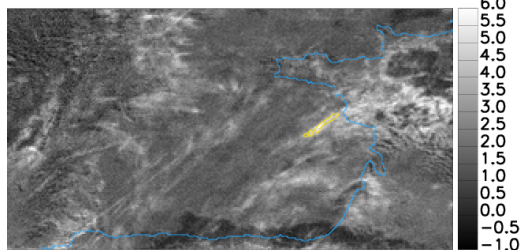

200904051525

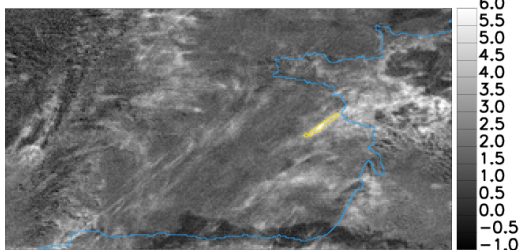

200904051530

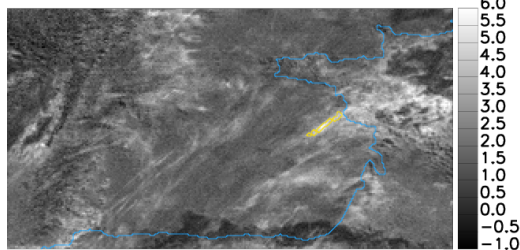

200904051535

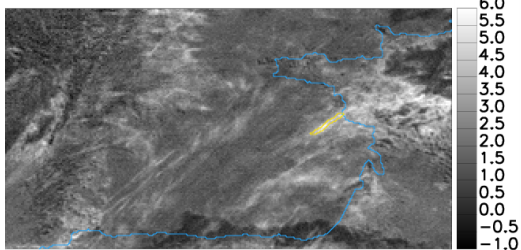

200904051540

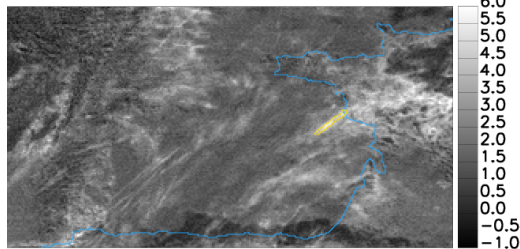

200904051545

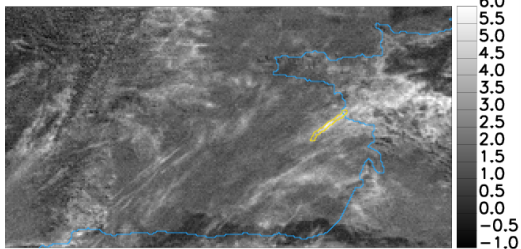

200904051550

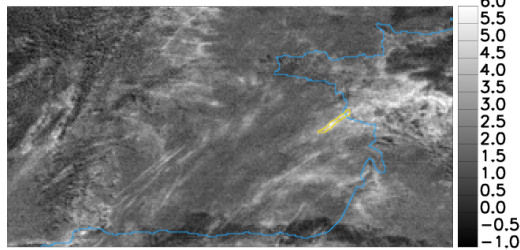

200904051555

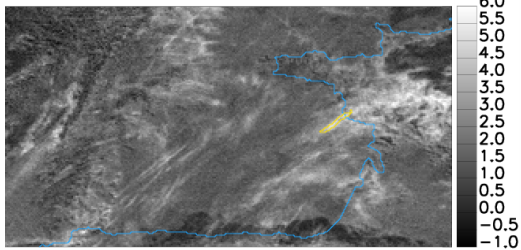

Supplement: Supplementary file 2 [file amt-3-1089-2010-supplement.zip]

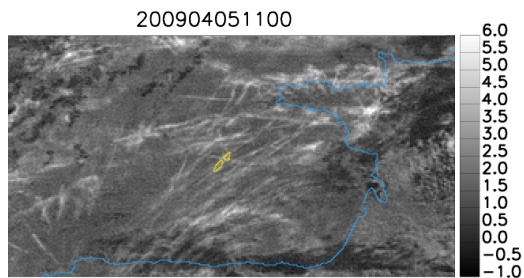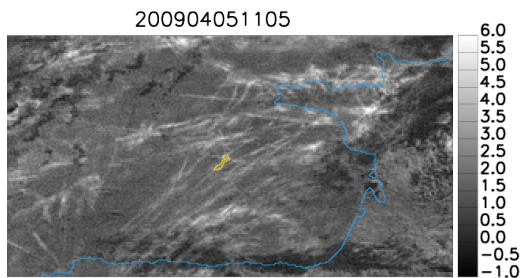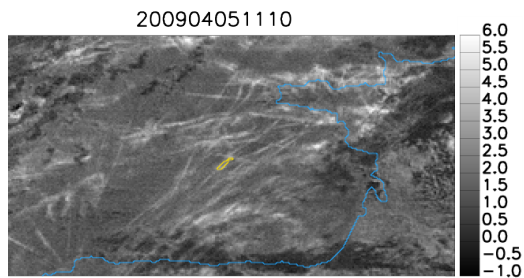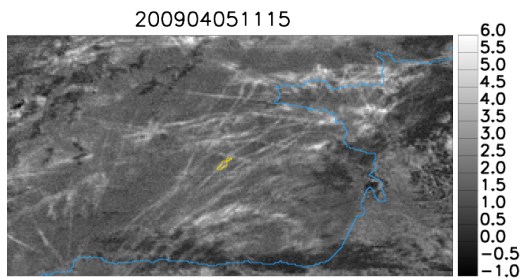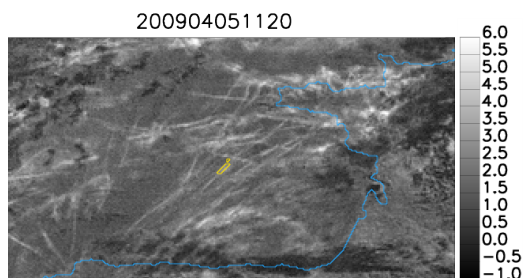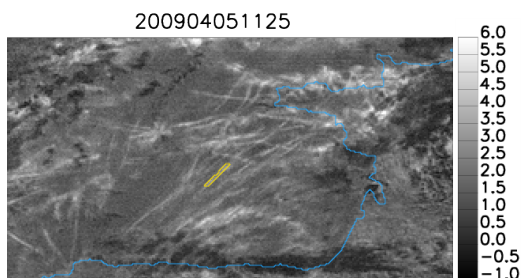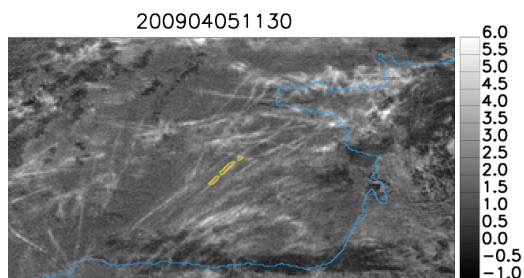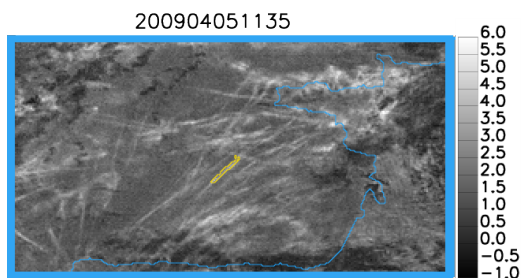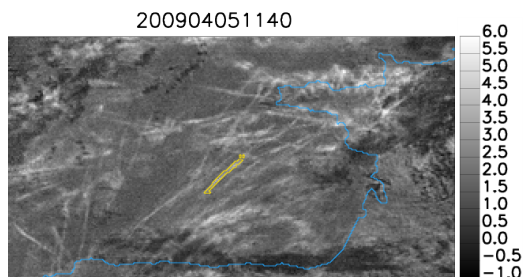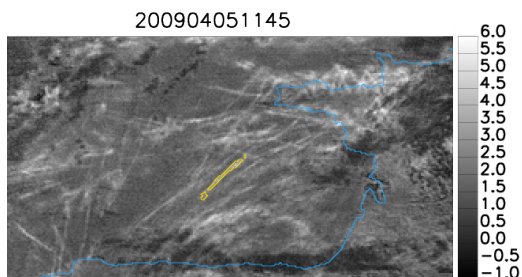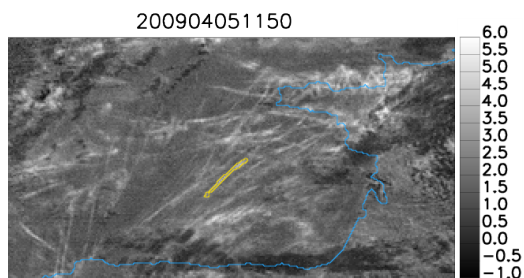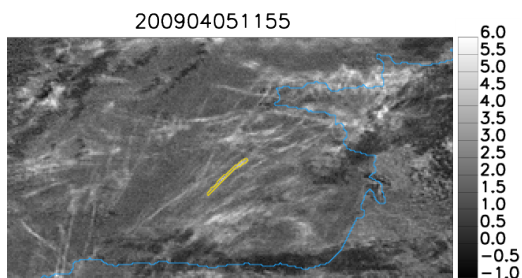

Supplement: Supplementary file 3 [file amt-3-1089-2010-supplement.zip]

200904051200

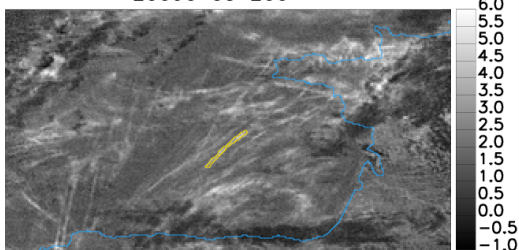

200904051205

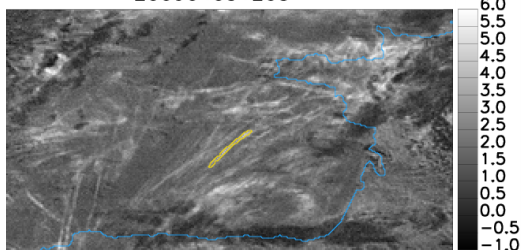

200904051210

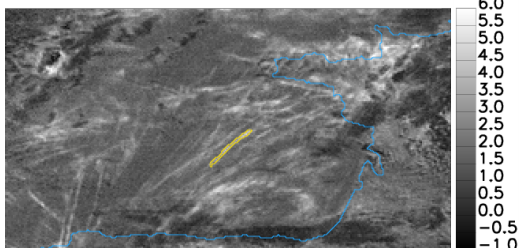

200904051215

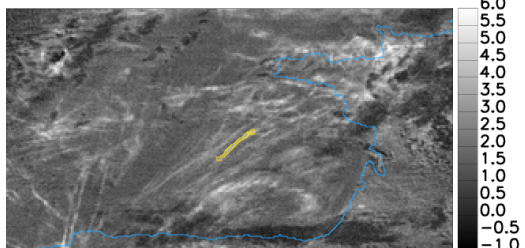

200904051220

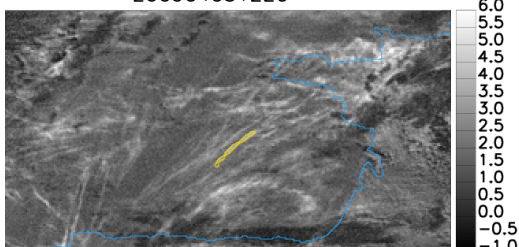

200904051225

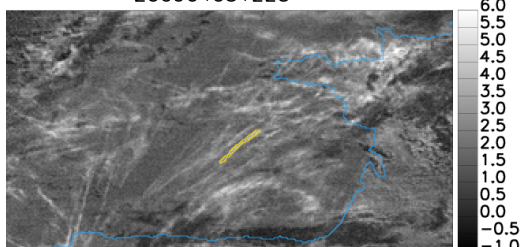

200904051230

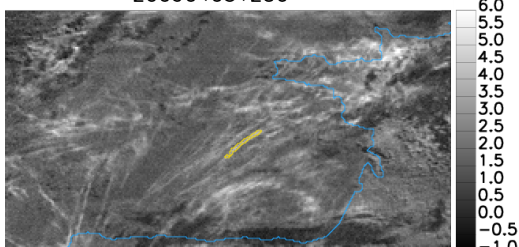

200904051235

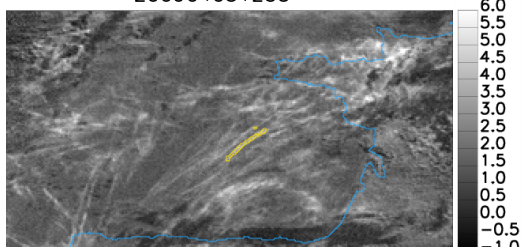

200904051240

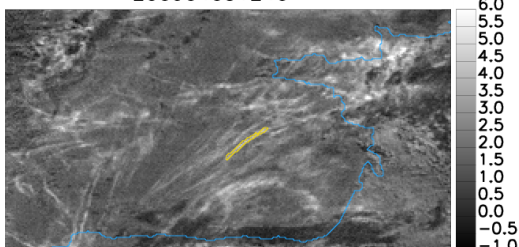

200904051245

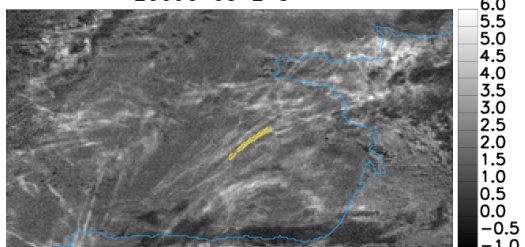

200904051250

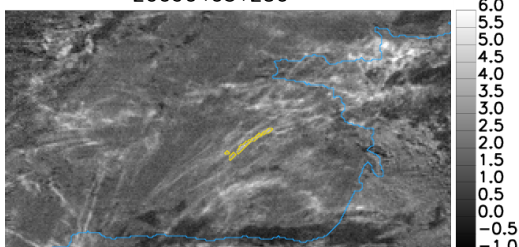

200904051255

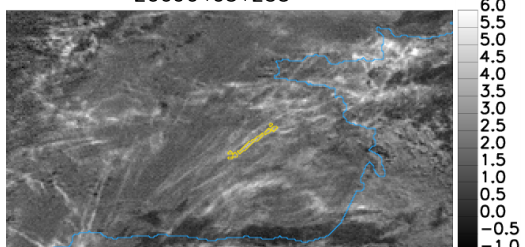

Supplement: Supplementary file 4 [file amt-3-1089-2010-supplement.zip]

200904051700

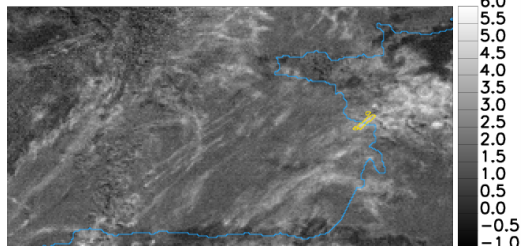

200904051705

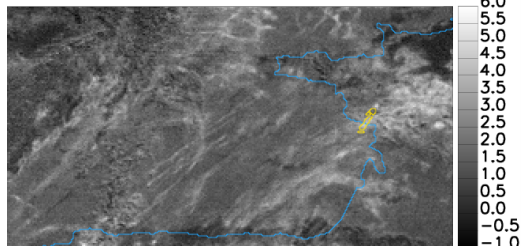

200904051710

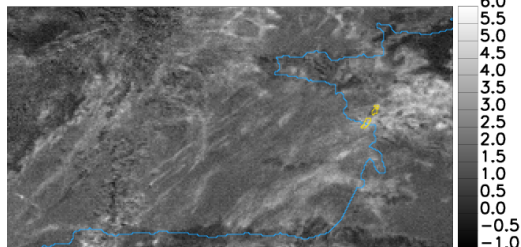

200904051715

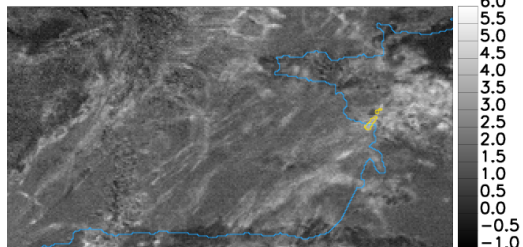

200904051720

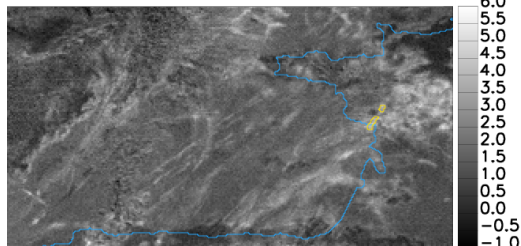

200904051725

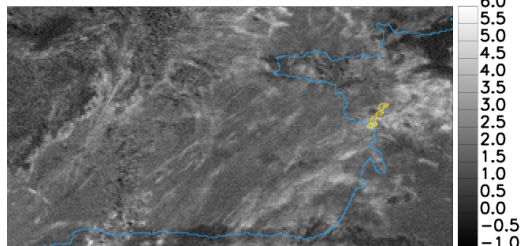

Supplement: Supplementary file 5 [file amt-3-1089-2010-supplement.zip]

200904051400

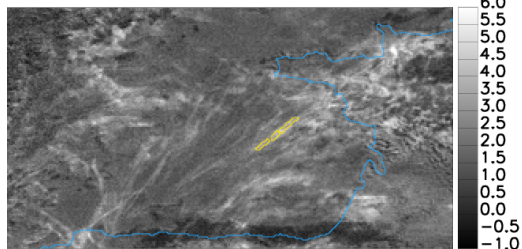

200904051405

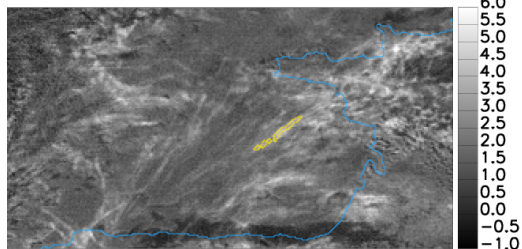

200904051410

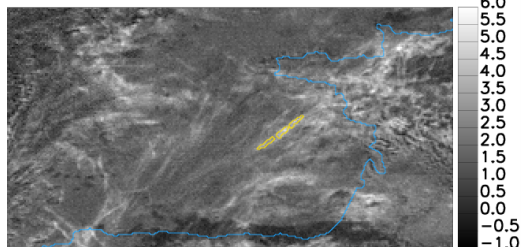

200904051415

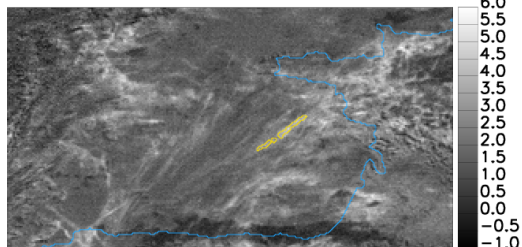

200904051420

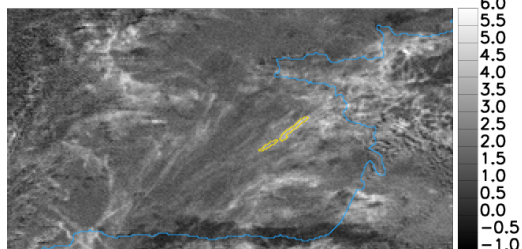

200904051425

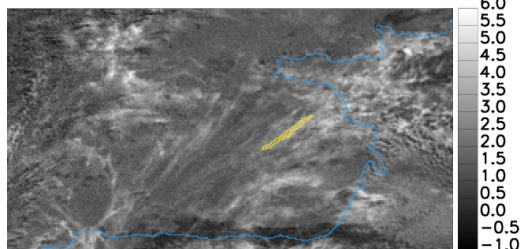

200904051430

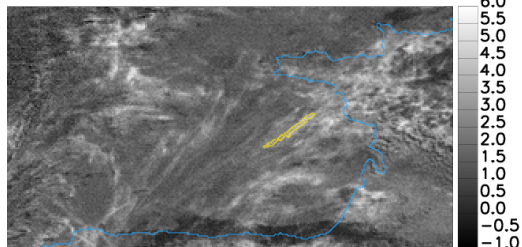

200904051435

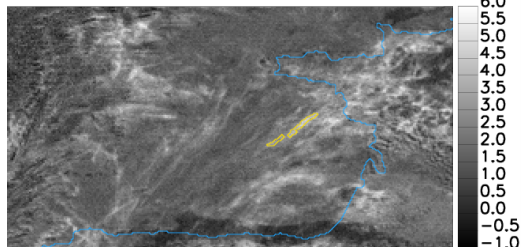

200904051440

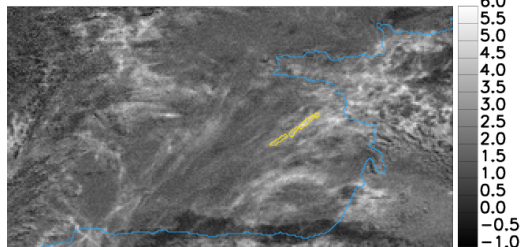

200904051445

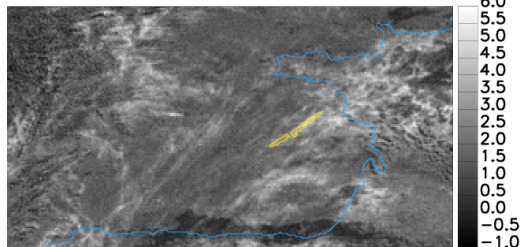

200904051450

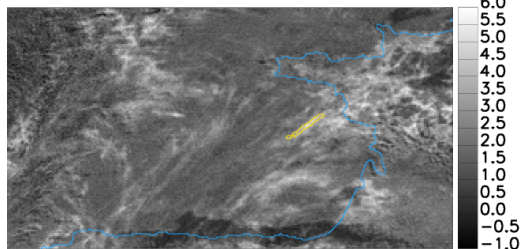

200904051455

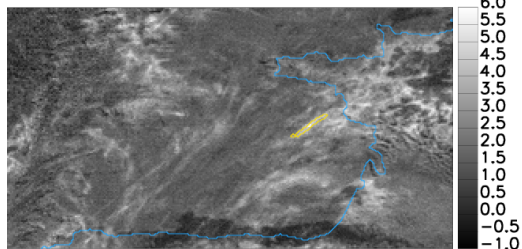

Supplement: Supplementary file 6 [file amt-3-1089-2010-supplement.zip]

200904051300

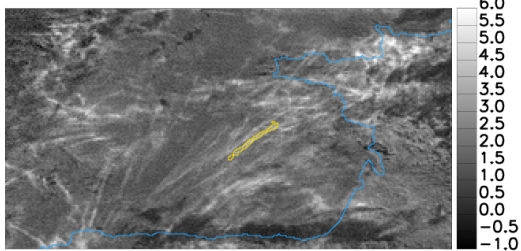

200904051305

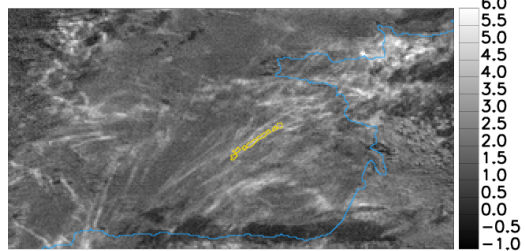

200904051310

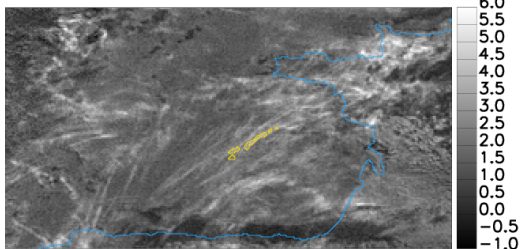

200904051315

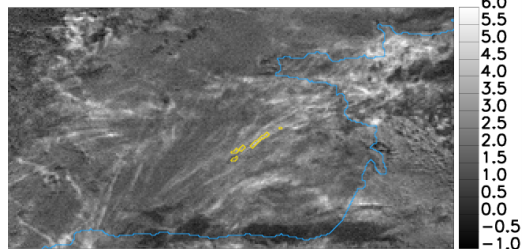

200904051320

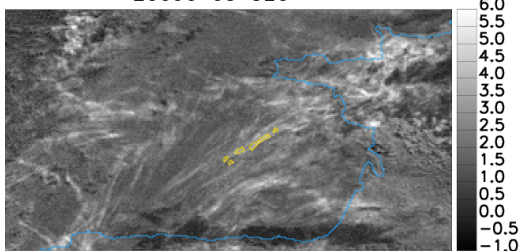

200904051325

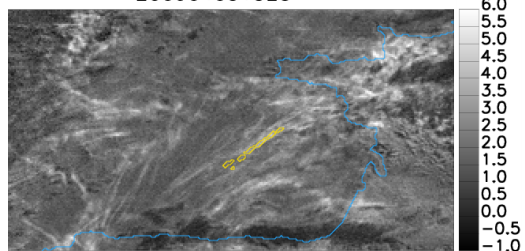

200904051330

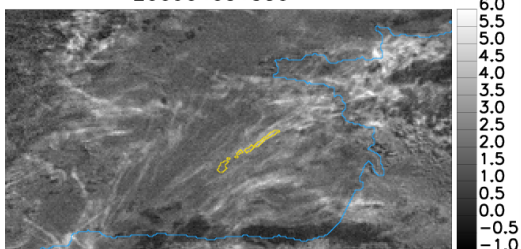

200904051335

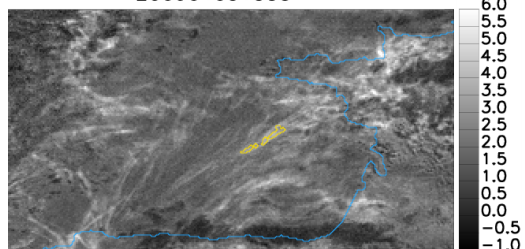

200904051340

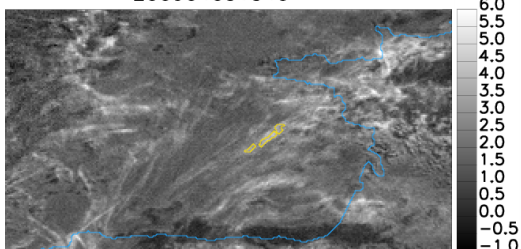

200904051345

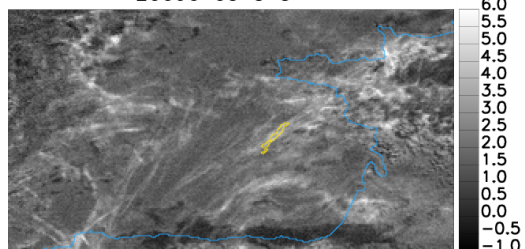

200904051350

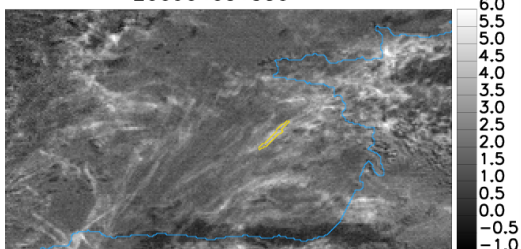

200904051355

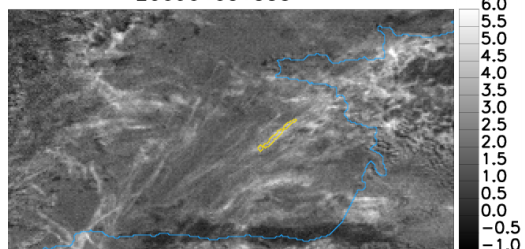

Supplement: Supplementary file 7 [file amt-3-1089-2010-supplement.zip]
